# Supplementary material for: A Genome-Wide Landscape of Retrocopies in Primate Genomes
Source: PubMed Central journal article supplement (PMC4558860; doi:10.1093/gbe/evv142), 2015-07-29
Supplement: supp_evv142_Supplemental-NavGal.pdf [file supp_evv142_Supplemental-NavGal.pdf]

## Supplemental Material

### A genome-wide landscape of retrocopies in primate genomes

Fábio C. P. Navarro and Pedro A. F. Galante

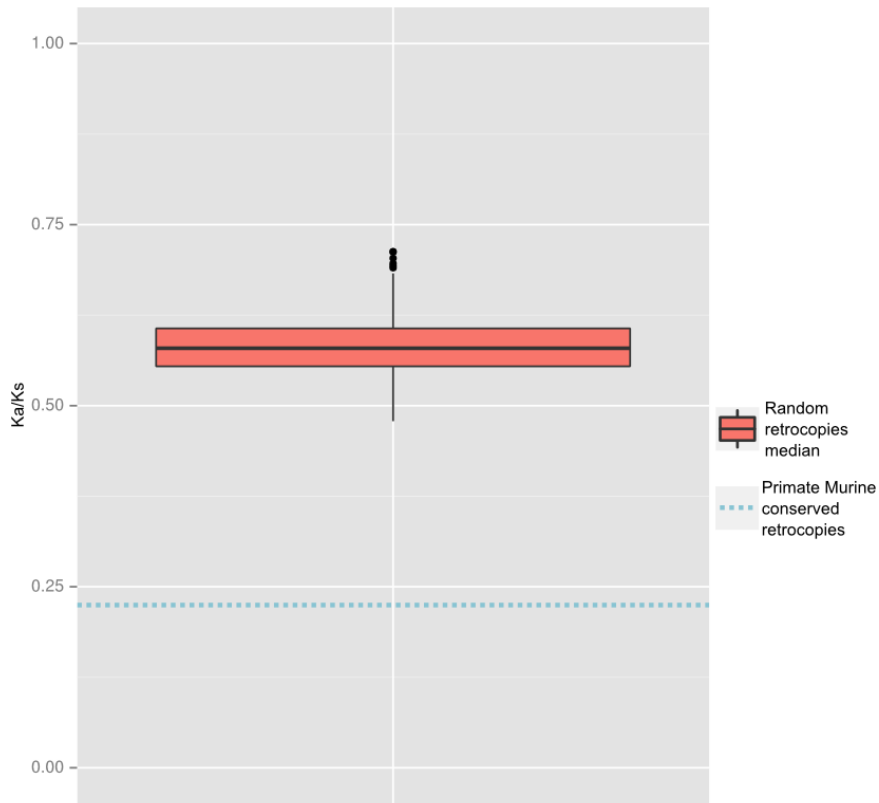

**Figure S1. Ka/Ks values of 1,000 random sets of retrocopies and retrocopies shared between rodent (murine) and primates.**

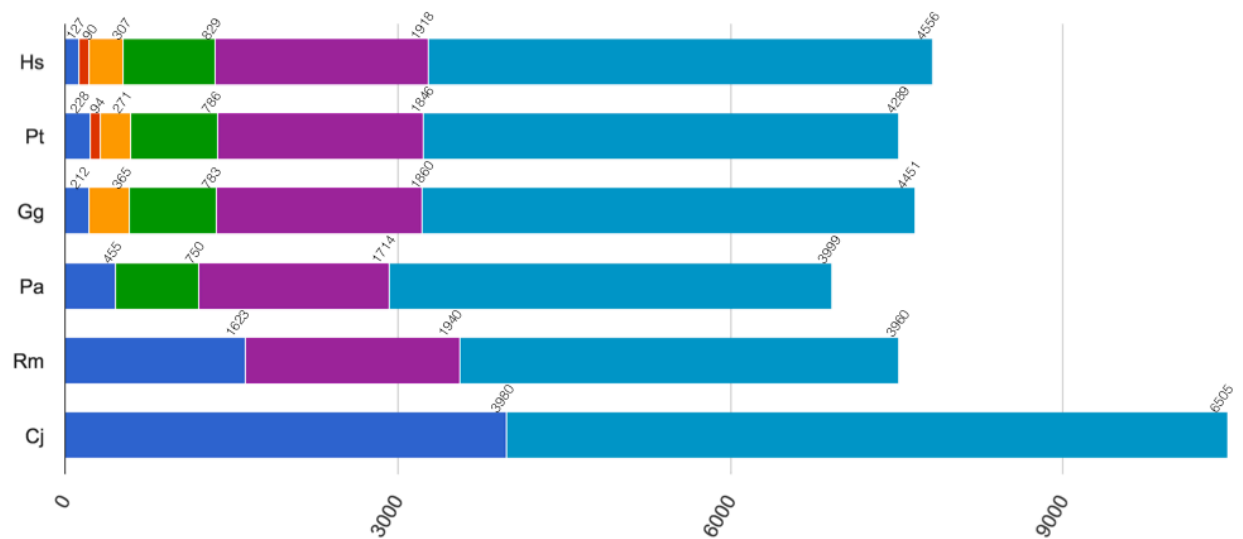

**Figure S2. Species-specific and shared retrocopies among primates.** Dark blue bars correspond to species-specific retrocopies; Red, yellow, green, purple and light blue bars correspond to retrocopies originated before Human-Chimpanzee Last Common Ancestor (LCA), Human-Chimpanzee-Gorilla LCA, Human-Chimpanzee-Gorilla-Orangutan LCA, Human-Chimpanzee-Gorilla-Orangutan-Rhesus LCA, Human-Chimpanzee-Gorilla-Orangutan-Rhesus-Marmoset LCA, respectively.

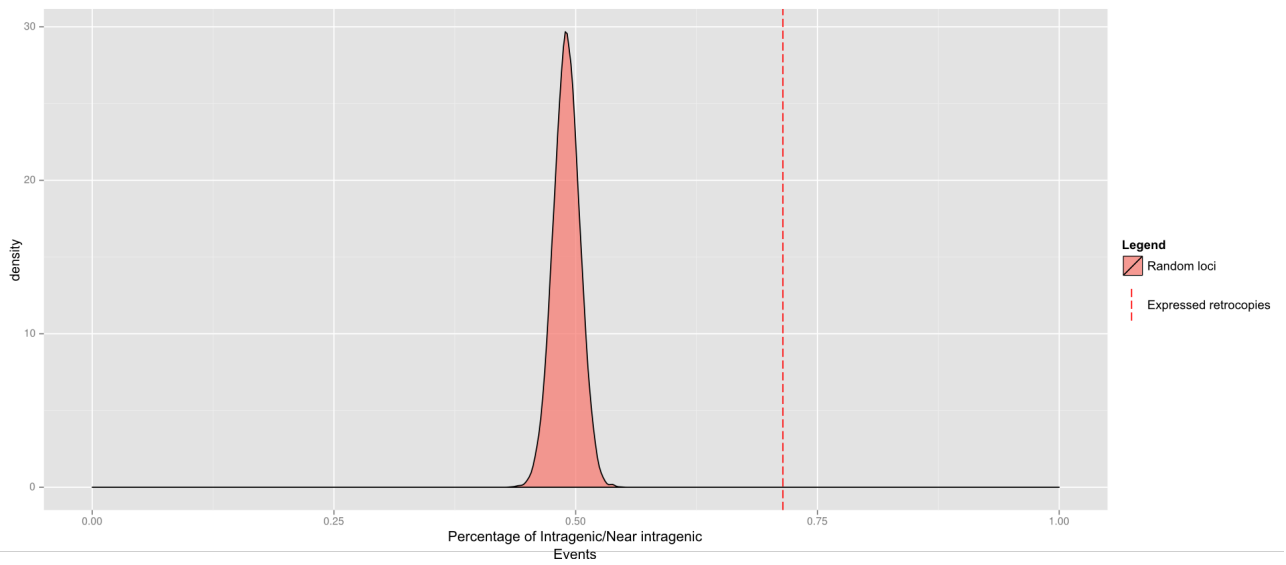

**Figure S3. Expressed retrocopies are located near or inside (intragenic) transcribed regions.** Percentage of intragenic/near retrocopies from 10,000 randomly selected groups containing 1,304 genomic loci; Dashed line: observed percentage of intragenic/near retrocopies annotated as “expressed retrocopy”.

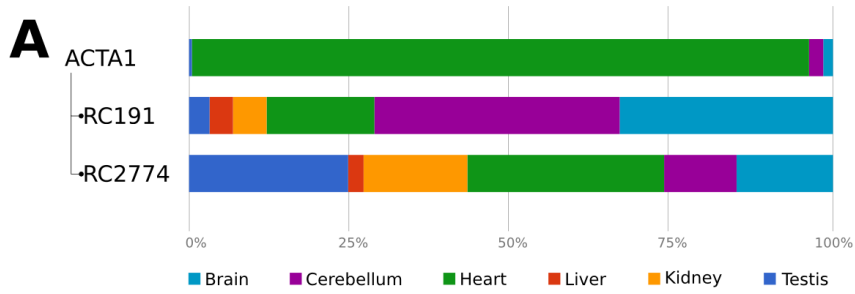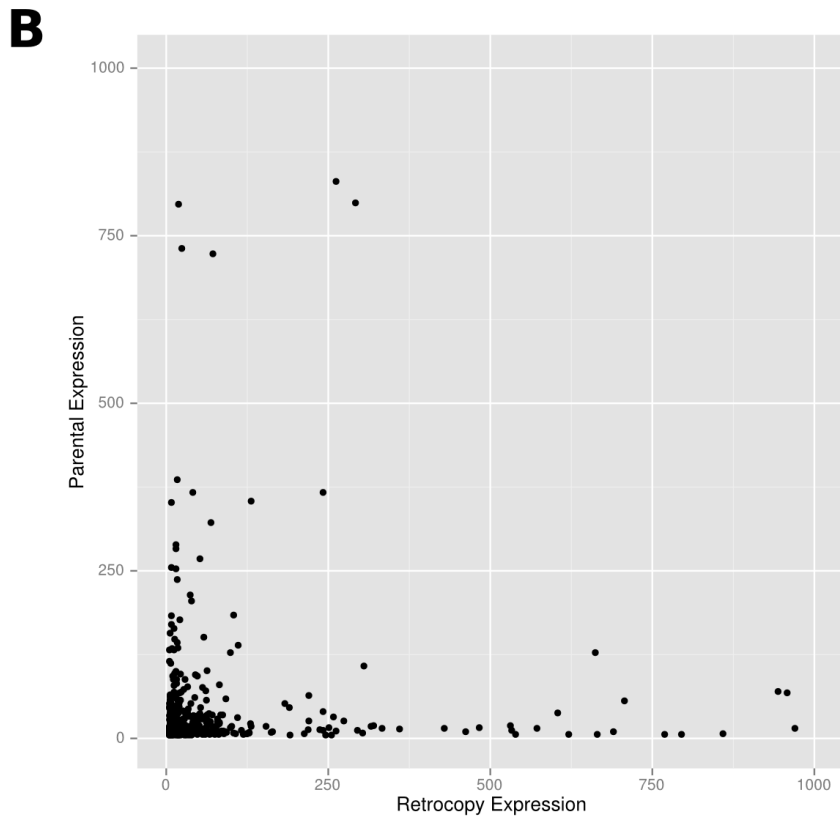

**Figure S4. Expression of retrocopies and their parental genes.** A) Percent of gene expression in the different tissues for ACTA1 (parental gene) and its two retrocopies (RC191 and RC2774). B) Scatter plot of expression for retrocopies and their parental genes (Spearman correlation = 0.46; p-value = 0.0241).

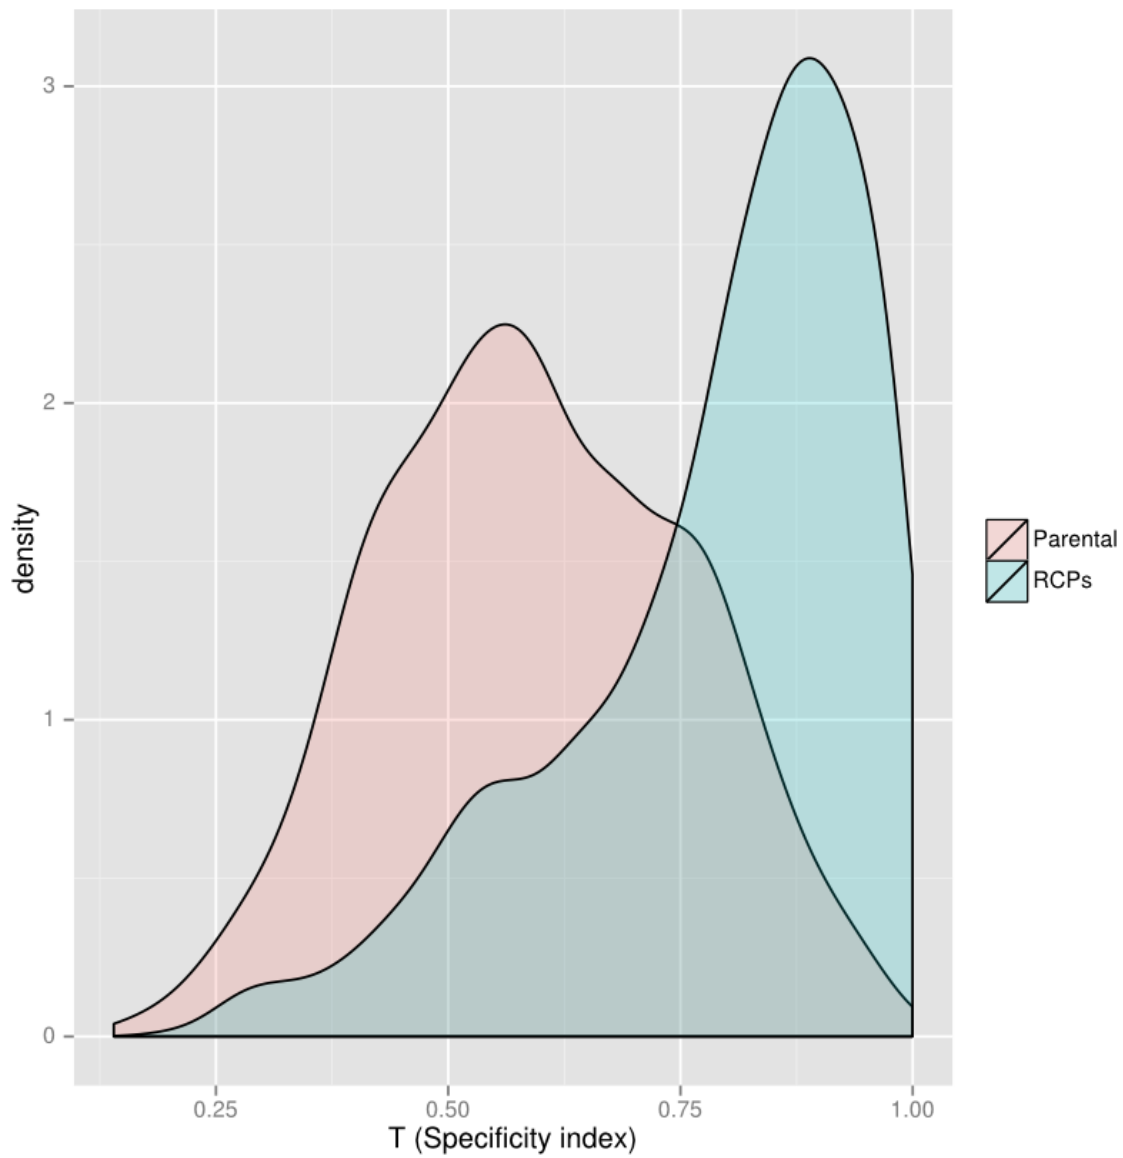

**Figure S5. Expression breadth for expressed retrocopies and their parental genes.** Here, we used the tissue specificity index ( $\tau$ ) developed by (Yanai et al. 2005), which ranges from 0 (broad expression) to 1 (more tissue specific expression). Retrocopies (RCPs) present more tissue specific expression (p-value < 2.2e-16; Mann-Whitney U test).

**Table S1. Primate genomes in summary.**

| Organism   | Genome Size | Number of Genes | Number of Transcripts | Number of Retrocopies | % of genome composed by LINEs/SINEs |
|------------|-------------|-----------------|-----------------------|-----------------------|-------------------------------------|
| Human      | 2.86Gb      | 19,364          | 32,201                | 7,831                 | 22.32% - 13.89%                     |
| Chimpanzee | 2.83Gb      | 20,998          | 33,616                | 7,657                 | 22.23% - 13.66%                     |
| Gorilla    | 2.92Gb      | 20,371          | 26,821                | 7,778                 | 20.35% - 11.35%                     |
| Orangutan  | 2.94Gb      | 23,284          | 28,671                | 6,962                 | 23.31% - 13.72%                     |
| Rhesus     | 2.93Gb      | 21,018          | 28,446                | 7,502                 | 18.86% - 12.54%                     |
| Marmoset   | 2.80Gb      | 18,739          | 23,275                | 11,039                | 21.34% - 13.45%                     |

**Table S2. Influence of assembly quality in the detection of retrocopy based on reference genomes.**

| Assembly name         | Organism   | Total assembly gap length | Number of scaffolds | Scaffold N50 | Contig N50 | Number of detected RCPs (including duplications) |
|-----------------------|------------|---------------------------|---------------------|--------------|------------|--------------------------------------------------|
| GRCh38                | Human      | 159970007                 | 735                 | 67794873     | 56413054   | 8356                                             |
| GRCh37                | Human      | 239852888                 | 258                 | 46395641     | 38440852   | 8335                                             |
| NCBI36                | Human      | 222405369                 | 378                 | 38509590     | 38509590   | 8343                                             |
| NCBI35                | Human      | 225449690                 | 379                 | 38509590     | 38509590   | 8288                                             |
| NCBI34                | Human      | 226873222                 | 490                 | 29104798     | 28857747   | 8263                                             |
| NCBI33                | Human      | 238331975                 | 545                 | 25443670     | 25443670   | 8224                                             |
| Pan_troglodytes-2.1.4 | Chimpanzee | 407207672                 | 27005               | 8925874      | 50656      | 7119                                             |
| Pan_troglodytes-2.1.3 | Chimpanzee | 407399385                 | 26994               | 9211238      | 50595      | 7657                                             |
| Pan_troglodytes-2.1   | Chimpanzee | 440199864                 | 32300               | 8803938      | 30568      | 7229                                             |

\* these data include retrocopies generated by genomic duplications of regions containing retrocopies, which were removed from the retrocopy sets used in the main analyses.







**Table S4. Gene ontology classification (Biological process) for retrocopies shared between rodent and primates.**

| <b>Category</b>    | <b>GO term</b>                                                                                  | <b>Number of retrocopied genes</b> | <b>Percentage of shared retrogenes</b> | <b>Parental gene name</b>                            |
|--------------------|-------------------------------------------------------------------------------------------------|------------------------------------|----------------------------------------|------------------------------------------------------|
| BIOLOGICAL PROCESS | GO:0006397~mRNA processing                                                                      | 6                                  | 12.8%                                  | PAPOLB, HNRNPH2, PCBP1, HNRNPF, CPSF4, CSTF2T        |
| BIOLOGICAL PROCESS | GO:0006396~RNA processing                                                                       | 7                                  | 14.9%                                  | PAPOLB, HNRNPH2, PCBP1, HNRNPF, FBLL1, CPSF4, CSTF2T |
| BIOLOGICAL PROCESS | GO:0006986~response to unfolded protein                                                         | 3                                  | 6.4%                                   | HSPA1L, HSPA7, HSPA1B                                |
| BIOLOGICAL PROCESS | GO:0051789~response to protein stimulus                                                         | 3                                  | 6.4%                                   | HSPA1L, HSPA7, HSPA1B                                |
| BIOLOGICAL PROCESS | GO:0044265~cellular macromolecule catabolic process                                             | 6                                  | 12.8%                                  | PJA1, USP27X, WDR5B, KLHL9, UBC, HSPA1B              |
| BIOLOGICAL PROCESS | GO:0009057~macromolecule catabolic process                                                      | 6                                  | 12.8%                                  | PJA1, USP27X, WDR5B, KLHL9, UBC, HSPA1B              |
| BIOLOGICAL PROCESS | GO:0019941~modification-dependent protein catabolic process                                     | 5                                  | 10.6%                                  | PJA1, USP27X, WDR5B, KLHL9, UBC                      |
| BIOLOGICAL PROCESS | GO:0043632~modification-dependent macromolecule catabolic process                               | 5                                  | 10.6%                                  | PJA1, USP27X, WDR5B, KLHL9, UBC                      |
| BIOLOGICAL PROCESS | GO:0000398~nuclear mRNA splicing, via spliceosome                                               | 3                                  | 6.4%                                   | HNRNPH2, PCBP1, HNRNPF                               |
| BIOLOGICAL PROCESS | GO:0000375~RNA splicing, via transesterification reactions                                      | 3                                  | 6.4%                                   | HNRNPH2, PCBP1, HNRNPF                               |
| BIOLOGICAL PROCESS | GO:0000377~RNA splicing, via transesterification reactions with bulged adenosine as nucleophile | 3                                  | 6.4%                                   | HNRNPH2, PCBP1, HNRNPF                               |
| BIOLOGICAL PROCESS | GO:0051603~proteolysis involved in cellular protein catabolic process                           | 5                                  | 10.6%                                  | PJA1, USP27X, WDR5B, KLHL9, UBC                      |
| BIOLOGICAL PROCESS | GO:0044257~cellular protein catabolic process                                                   | 5                                  | 10.6%                                  | PJA1, USP27X, WDR5B, KLHL9, UBC                      |
| BIOLOGICAL PROCESS | GO:0030163~protein catabolic process                                                            | 5                                  | 10.6%                                  | PJA1, USP27X, WDR5B, KLHL9, UBC                      |
| BIOLOGICAL PROCESS | GO:0051153~regulation of striated muscle cell differentiation                                   | 2                                  | 4.3%                                   | MORF4L2, UBC                                         |
| BIOLOGICAL PROCESS | GO:0051147~regulation of muscle cell differentiation                                            | 2                                  | 4.3%                                   | MORF4L2, UBC                                         |
| BIOLOGICAL PROCESS | GO:0006508~proteolysis                                                                          | 6                                  | 12.8%                                  | DDI1, PJA1, USP27X, WDR5B, KLHL9, UBC                |

**Table S5. Expression of the rodent/primates shared retrocopies in 5 human tissues (testis, Nervous system (brain and cerebellum), liver, kidney, and heart).**

| Expression in              | Number of human retrocopies |
|----------------------------|-----------------------------|
| <b>Testis</b>              | 48                          |
| <b>Testis specific</b>     | 14                          |
| <b>Brain</b>               | 31                          |
| <b>Brain specific</b>      | 0                           |
| <b>Cerebellum</b>          | 31                          |
| <b>Cerebellum specific</b> | 1                           |
| <b>Liver</b>               | 23                          |
| <b>Liver specific</b>      | 0                           |
| <b>Kidney</b>              | 25                          |
| <b>Kidney specific</b>     | 0                           |
| <b>Heart</b>               | 29                          |
| <b>Heart specific</b>      | 1                           |

**Table S6. Expression correlation between expressed retrocopies and their hosts or neighboring genes.** Only retrocopies containing more than 40 reads reporting expression were used.

| Genomic location            | Expected transcription orientation* | Correlation ( $\rho$ ) | P-value   |
|-----------------------------|-------------------------------------|------------------------|-----------|
| <b>Intragenic retrocopy</b> | Same                                | 0.916834               | 4.701e-11 |
| <b>Intragenic retrocopy</b> | Opposite                            | -0.2296897             | 0.2491    |
| <b>Downstream</b>           | Same                                | 0.9794524              | < 2.2e-16 |
| <b>Downstream</b>           | Opposite                            | 0.9698909              | < 2.2e-16 |
| <b>Upstream</b>             | Same                                | 0.0913412              | 0.4326    |
| <b>Upstream</b>             | Opposite                            | -0.1388423             | 0.4563    |

\* Expected transcription orientation for retrocopies and hosts or neighboring genes

\*\* Spearman's correlations

**Table S7. Number of L1 sub elements in the primate genome.**

| L1 elements | Human | Chimpanzee | Gorilla | Orangutan | Rhesus | Marmoset |
|-------------|-------|------------|---------|-----------|--------|----------|
| HAL1        | 14884 | 15033      | 12219   | 16136     | 14482  | 13339    |
| L1M4        | 10775 | 11806      | 13615   | 14355     | 11714  | 11430    |
| L1M5        | 44929 | 46701      | 40122   | 50650     | 44247  | 42913    |
| L1MA9       | 10004 | 10302      | 9660    | 11124     | 9076   | 8901     |
| L1MB3       | 10811 | 11020      | 10451   | 11866     | 9565   | 9600     |
| L1MB7       | 12771 | 12928      | 12366   | 15221     | 11338  | 11757    |
| L1MC4       | 16689 | 17052      | 14547   | 18332     | 16944  | 15029    |
| L1MC4a      | 16566 | 16619      | 6443    | 18184     | 15717  | 13754    |
| L1MC5       | 13456 | 13615      | 9995    | 14385     | 12725  | 11974    |
| L1ME1       | 16577 | 16698      | 16118   | 17625     | 14601  | 14655    |
| L1ME4a      | 30185 | 30085      | 24903   | 31189     | 24753  | 22685    |
| L1PA7       | 10125 | 10322      | 9673    | 11153     | 9280   | 83541    |

**Retrocopies annotated by GenCode, pseudogene.org and/or RCPedia (our methods).**

To better understand the reliability of our detection of protein-coding retroposition pipeline, we compared the retrocopies identified here (called RCPedia, since these retrocopies are available at RCPedia (Navarro & Galante 2013)) against retrocopies (there, called processed pseudogene) from two databases: (i) pseudogene.org and (ii) GENCODE . Since GENCODE doesn't make available the parental genes, we relied solely on the retrocopy coordinates in the reference genome.

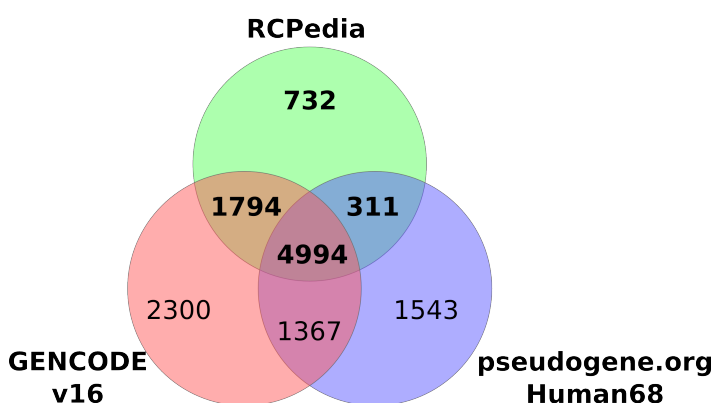

**Figure S6. Retrocopies identified and shared by our method (RCPedia), pseudogene.org and GENCODE.**

GENCODE and pseudogene.org have 10,455 and 8,215 genomic loci classified as processed pseudogene, respectively. Figure S8 shows that 91% of retrocopies identified by us

have been previously identified. GENCODE and pseudogene.org presented 78% and 81% of its retrocopies also confirmed by other databases. In order to understand better those database specific retrocopies, we performed a comparison between a set of retrocopies from RCPedia and GENCODE. We selected GENCODE because it is the current gold standard of gene and transcript annotation for human currently.

As expected, RCPedia and GENCODE are highly concordant, 6,788 shared retrocopies (87% of RCPedia events), where 3,667 events are specific to GENCODE and potentially false negatives on our database and 1,043 loci are specific to RCPedia, potentially false positives or false negative events in the GENCODE (Figure S8). Given the relative high number of events specific to each method we have manually analyzed 30 and 20 specific events from GENCODE and RCPedia, respectively.

**Table S8. Random set of 30 processed pseudogene events specific to GENCODE in comparison to RCPedia.**

|    | Chr   | Start     | End       | Parental Transcript | Length | Manual annotation                      |
|----|-------|-----------|-----------|---------------------|--------|----------------------------------------|
| 1  | chr14 | 19336524  | 19336668  | ENSG00000257721.1   | 144    | Genome duplication                     |
| 2  | chr2  | 132250386 | 132277994 | ENSG00000152117.13  | 27608  | Unprocessed pseudogene                 |
| 3  | chr19 | 58175648  | 58176407  | ENSG00000269097.1   | 759    | 2 exons – Old retrocopy                |
| 4  | chr16 | 31176969  | 31177248  | ENSG00000263343.1   | 279    | 2 exons – Old retrocopy                |
| 5  | chr2  | 131185304 | 131186798 | ENSG00000230646.1   | 1494   | 3 exons – Old retrocopy                |
| 6  | chr3  | 20049344  | 20049739  | ENSG00000230697.1   | 395    | Not aligned (using BLAT)               |
| 7  | chr16 | 70113032  | 70113527  | ENSG00000241183.1   | 495    | Genome duplication                     |
| 8  | chr9  | 41776064  | 41777434  | ENSG00000269692.1   | 1370   | Genome duplication                     |
| 9  | chr15 | 82664459  | 82748784  | ENSG00000237550.4   | 84325  | Genome duplication                     |
| 10 | chr21 | 15148407  | 15149587  | ENSG00000173231.6   | 1180   | Genome duplication                     |
| 11 | chr22 | 16122720  | 16123768  | ENSG00000215270.3   | 1048   | Genome duplication                     |
| 12 | chr11 | 89498052  | 89498306  | ENSG00000255170.2   | 254    | Genome duplication                     |
| 13 | chr12 | 8559429   | 8559791   | ENSG00000256136.1   | 362    | Genome duplication                     |
| 14 | chr22 | 36568982  | 36569996  | ENSG00000231576.1   | 1014   | NumTs                                  |
| 15 | chr9  | 42779843  | 42779998  | ENSG00000225433.2   | 155    | NumTs                                  |
| 16 | chrX  | 102061669 | 102062752 | ENSG00000229794.2   | 1083   | NumTs                                  |
| 17 | chr12 | 85333303  | 85333447  | ENSG00000258073.1   | 144    | Repetitive Elements – LTR              |
| 18 | chr16 | 34375269  | 34375779  | ENSG00000260449.1   | 510    | Repetitive Elements – Satellite (SST1) |
| 19 | chr8  | 43139769  | 43139949  | ENSG00000253707.1   | 180    | Single exon parental gene              |
| 20 | chrX  | 51453887  | 51454372  | ENSG00000223591.4   | 485    | Tandem Duplication                     |
| 21 | chr12 | 34315397  | 34315903  | ENSG00000256986.1   | 506    | Unknown parental gene                  |
| 22 | chr17 | 21476800  | 21477010  | ENSG00000265363.1   | 210    | Unknown parental gene                  |
| 23 | chr11 | 50249920  | 50250104  | ENSG00000255001.1   | 184    | Unknown parental gene                  |
| 24 | chr14 | 74005925  | 74006485  | ENSG00000258408.1   | 560    | Unknown parental gene                  |
| 25 | chr8  | 13210910  | 13211039  | ENSG00000253257.1   | 129    | Without exon junction                  |
| 26 | chr4  | 29909281  | 29909413  | ENSG00000249564.1   | 132    | Without exon junction                  |
| 27 | chr9  | 41796924  | 41797395  | ENSG00000231511.2   | 471    | Without exon junction                  |
| 28 | chr12 | 25593809  | 25593986  | ENSG00000255988.1   | 177    | Without exon junction                  |
| 29 | chr2  | 75825197  | 75825685  | ENSG00000230477.1   | 488    | Without exon junction                  |
| 30 | chrX  | 27865705  | 27866056  | ENSG00000232834.1   | 351    | Without exon junction                  |

As evidenced by Table S8, most of the unshared events between GENCODE and RCPedia are due to the several reasons. For example, performing a manual alignment using BLAT at UCSC Genome Browser, we found that 6 events (lines #25-#30) classified as processed pseudogene are copies from single exons, which make more difficult to confirm their retrotransposition origin (our method is not able to detect them). We also found four events without known parental genes (#21 to #24), since then the alignment of the annotated loci does not point back to RefSeq sequences or GENCODE transcripts. We also, identified 8 events originated from genomic duplications (#1, #7 to #12) of a retroposition event (which is also discarded by our pipeline). We also identified putative retrocopied loci that gained two or more introns (#2 to #5; also excluded from our candidates). We observed the presence of NumTS (#14 to #16) at the set of processed pseudogene, which we strongly disagree since processed pseudogenes are initially interpreted by literature as loci resulting from a reverse transcription event. Finally, we also found a multi-exonic transcript ranging 27Kb (ENSG00000152117.13) without evidence of being retrocopied and a LTR (#17) annotated as processed pseudogene.

**Table S9. Random set retrocopies identified only by RCPedia in comparison to GENCODE.** “Details” presents links to their full descriptions at RCPedia web page.

|    | Chr   | Start     | End       | Parental Transcript | Length | Details                                                                                                                                       |
|----|-------|-----------|-----------|---------------------|--------|-----------------------------------------------------------------------------------------------------------------------------------------------|
| 1  | chr6  | 35038627  | 35038826  | NM_001016           | 199    | <a href="http://www.bioinfo.mochsl.org.br/rcpedia/retrocopies/view/70596">http://www.bioinfo.mochsl.org.br/rcpedia/retrocopies/view/70596</a> |
| 2  | chr2  | 8897224   | 8898480   | NM_001177           | 1256   | <a href="http://www.bioinfo.mochsl.org.br/rcpedia/retrocopies/view/68126">http://www.bioinfo.mochsl.org.br/rcpedia/retrocopies/view/68126</a> |
| 3  | chr2  | 74104255  | 74105990  | NM_022494           | 1735   | <a href="http://www.bioinfo.mochsl.org.br/rcpedia/retrocopies/view/67911">http://www.bioinfo.mochsl.org.br/rcpedia/retrocopies/view/67911</a> |
| 4  | chr6  | 64190037  | 64191831  | NM_021121           | 1794   | <a href="http://www.bioinfo.mochsl.org.br/rcpedia/retrocopies/view/70583">http://www.bioinfo.mochsl.org.br/rcpedia/retrocopies/view/70583</a> |
| 5  | chr7  | 44947961  | 44948360  | NM_005274           | 399    | <a href="http://www.bioinfo.mochsl.org.br/rcpedia/retrocopies/view/70739">http://www.bioinfo.mochsl.org.br/rcpedia/retrocopies/view/70739</a> |
| 6  | chrX  | 56590436  | 56593256  | NM_013438           | 2820   | <a href="http://www.bioinfo.mochsl.org.br/rcpedia/retrocopies/view/72013">http://www.bioinfo.mochsl.org.br/rcpedia/retrocopies/view/72013</a> |
| 7  | chr7  | 138913182 | 138913982 | NM_001071775        | 800    | <a href="http://www.bioinfo.mochsl.org.br/rcpedia/retrocopies/view/71039">http://www.bioinfo.mochsl.org.br/rcpedia/retrocopies/view/71039</a> |
| 8  | chr1  | 185301590 | 185302404 | NM_022818           | 814    | <a href="http://www.bioinfo.mochsl.org.br/rcpedia/retrocopies/view/65037">http://www.bioinfo.mochsl.org.br/rcpedia/retrocopies/view/65037</a> |
| 9  | chr22 | 22457789  | 22459091  | NM_001085411        | 1302   | <a href="http://www.bioinfo.mochsl.org.br/rcpedia/retrocopies/view/68683">http://www.bioinfo.mochsl.org.br/rcpedia/retrocopies/view/68683</a> |
| 10 | chr17 | 63996465  | 63997308  | NM_005796           | 843    | <a href="http://www.bioinfo.mochsl.org.br/rcpedia/retrocopies/view/67216">http://www.bioinfo.mochsl.org.br/rcpedia/retrocopies/view/67216</a> |
| 11 | chr20 | 11585629  | 11589768  | NM_024674           | 4139   | <a href="http://www.bioinfo.mochsl.org.br/rcpedia/retrocopies/view/68555">http://www.bioinfo.mochsl.org.br/rcpedia/retrocopies/view/68555</a> |
| 12 | chr9  | 92324648  | 92325069  | NM_021104           | 421    | <a href="http://www.bioinfo.mochsl.org.br/rcpedia/retrocopies/view/71655">http://www.bioinfo.mochsl.org.br/rcpedia/retrocopies/view/71655</a> |
| 13 | chr11 | 11202851  | 11203962  | NM_004965           | 1111   | <a href="http://www.bioinfo.mochsl.org.br/rcpedia/retrocopies/view/65502">http://www.bioinfo.mochsl.org.br/rcpedia/retrocopies/view/65502</a> |

|    | Chr   | Start    | End      | Parental Transcript | Length | Details                                                                                                                                       |
|----|-------|----------|----------|---------------------|--------|-----------------------------------------------------------------------------------------------------------------------------------------------|
| 14 | chr5  | 94107897 | 94108107 | NM_007209           | 210    | <a href="http://www.bioinfo.mochsl.org.br/rcpedia/retrocopies/view/70002">http://www.bioinfo.mochsl.org.br/rcpedia/retrocopies/view/70002</a> |
| 15 | chr2  | 65860969 | 65861129 | NM_015933           | 160    | <a href="http://www.bioinfo.mochsl.org.br/rcpedia/retrocopies/view/67912">http://www.bioinfo.mochsl.org.br/rcpedia/retrocopies/view/67912</a> |
| 16 | chr2  | 70315029 | 70316278 | NM_001128912        | 1249   | <a href="http://www.bioinfo.mochsl.org.br/rcpedia/retrocopies/view/67853">http://www.bioinfo.mochsl.org.br/rcpedia/retrocopies/view/67853</a> |
| 17 | chr17 | 63996465 | 63997308 | NM_005796           | 843    | <a href="http://www.bioinfo.mochsl.org.br/rcpedia/retrocopies/view/67216">http://www.bioinfo.mochsl.org.br/rcpedia/retrocopies/view/67216</a> |
| 18 | chr11 | 56098383 | 56100015 | NM_016255           | 1632   | <a href="http://www.bioinfo.mochsl.org.br/rcpedia/retrocopies/view/65718">http://www.bioinfo.mochsl.org.br/rcpedia/retrocopies/view/65718</a> |
| 19 | chr8  | 74743365 | 74743721 | NM_002925           | 356    | <a href="http://www.bioinfo.mochsl.org.br/rcpedia/retrocopies/view/71222">http://www.bioinfo.mochsl.org.br/rcpedia/retrocopies/view/71222</a> |
| 20 | chr12 | 25070653 | 25071266 | NM_001344           | 613    | <a href="http://www.bioinfo.mochsl.org.br/rcpedia/retrocopies/view/66217">http://www.bioinfo.mochsl.org.br/rcpedia/retrocopies/view/66217</a> |

We manually analyzed 20 random retrocopies identified only by RCPedia (Table S9). Initially, we observed that, at least, two events annotated by our pipeline are described as protein-coding genes in GENCODE. As we stated, we do not make the distinction of pseudogenes and genes since we are interested on the general aspects of retroduplications and not at solely pseudogene specific features. We also found 4 (4,9,18,19) events annotated as unprocessed pseudogene and ambiguous ORF on loci that are clearly decedent of reverse transcription reaction, since they are intronless and present parental multi-exonic genes. The remaining events were all missed by GENCODE pipeline. While most of the events we could not explain the absence in the GENCODE, we see at least 3 events containing a high proportions of repetitive sequences. Therefore, despite the evident absence of false positives retrocopies on this set of 20 randomly selected retrocopies, we do not believe that all of our 1,043 specific events (not found in GENCODE) are true positive. We expect a small number (0.05%) of false positive candidates (Table S9).

Taken together these results highlight the complexity of annotating retrocopied loci. Even the two main standards for processed pseudogene (GENCODE and pseudogene.org) are far from being concordant. Here and in our previous publication (Navarro & Galante 2013), we try to shed light on this complexity and contribute to a robust base for future works in the retrocopy area.

## References

Navarro FCP, Galante PAF. 2013. RCPedia: a database of retrocopied genes. *Bioinformatics*. 29:1235–1237. doi: 10.1093/bioinformatics/btt104.

Yanai I et al. 2005. Genome-wide midrange transcription profiles reveal expression level relationships in human tissue specification. *Bioinformatics*. 21:650–659. doi: 10.1093/bioinformatics/bti042.
